# Supplementary material
Source: PubMed Central journal article supplement (PMC5668144)
Supplement: NIHMS908508-supplement-1.pdf [file NIHMS908508-supplement-1.pdf]

## Supplementary Data

Supplementary Figure 1

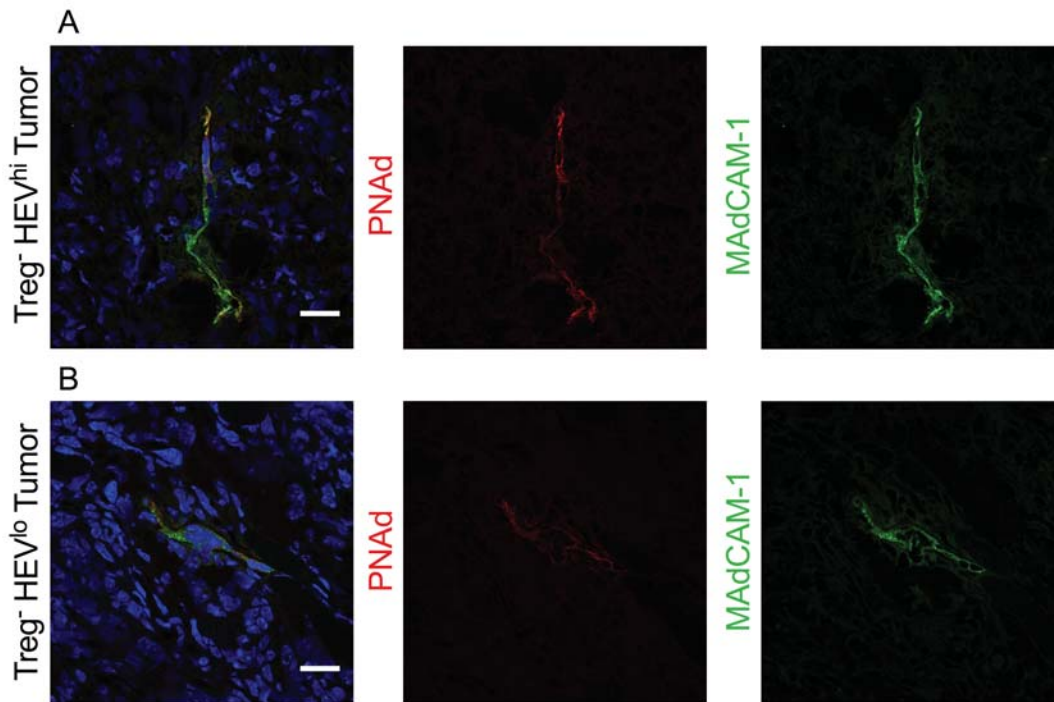

Supplementary Figure 1. Tumor HEV identified by PNAd staining are also positive for MAdCAM-1 (A) Representative high power images of HEV (PNAd; red, MAdCAM1; green, nuclear stain DAPI; blue) in frozen tumors from Treg<sup>-</sup>HEV<sup>hi</sup> (A) and Treg<sup>-</sup> HEV<sup>lo</sup> (B) tumors. Scale bars represent 20 $\mu$ m.

Supplementary Figure 2

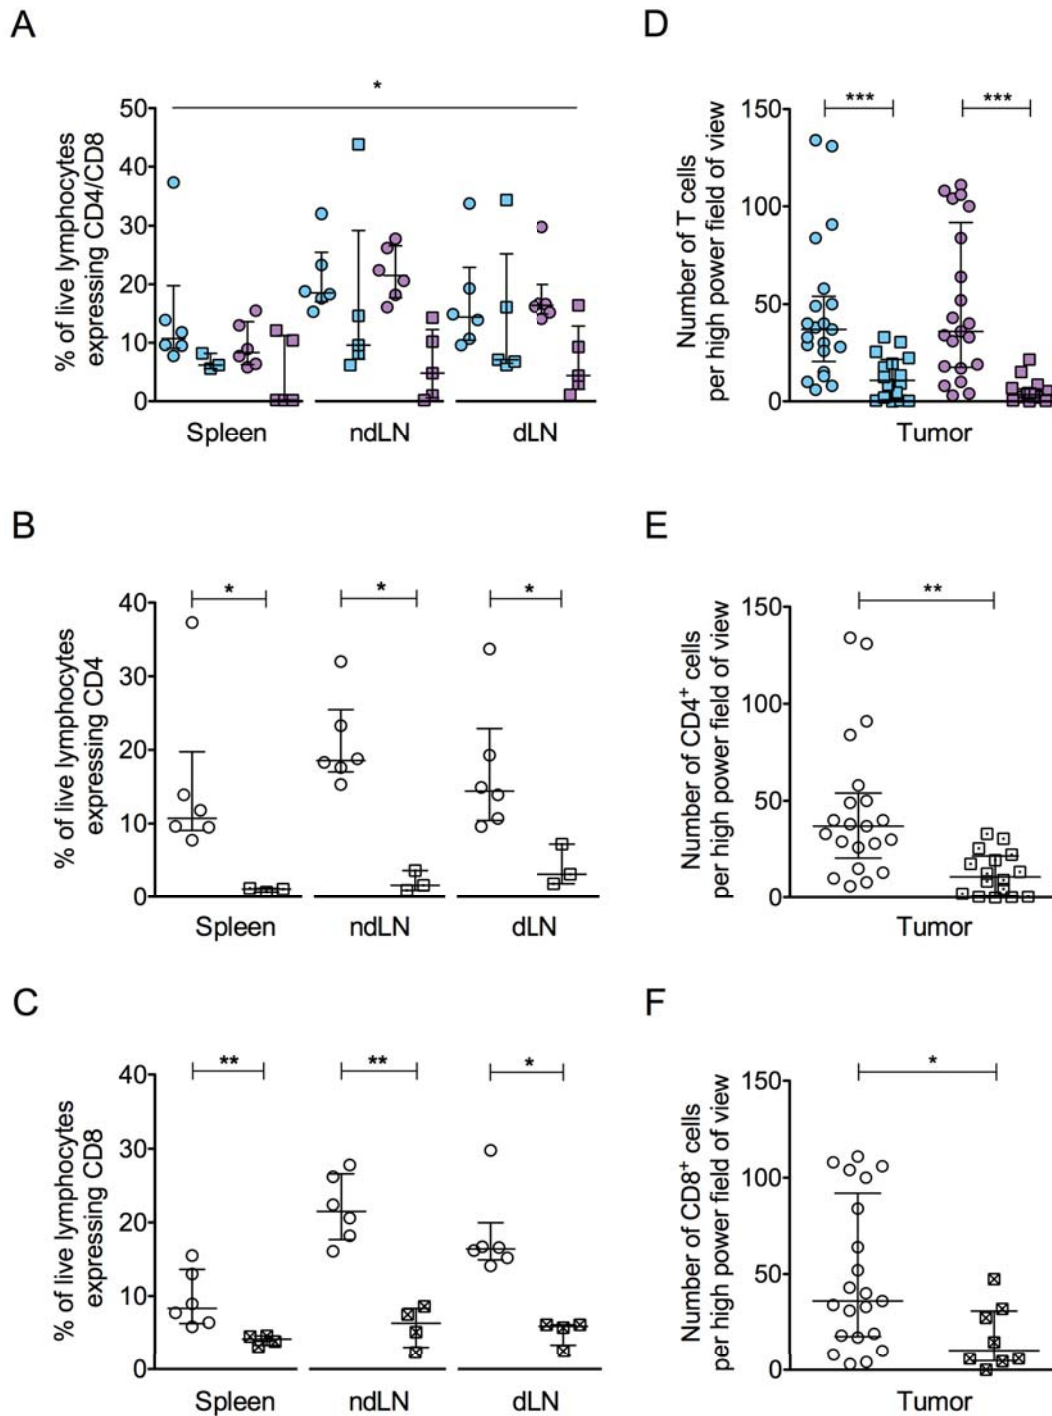

Supplementary Figure 2. Efficacy of monoclonal antibody treatments to deplete immune cell subsets (A-C) Proportion of live lymphocytes expressing CD4 or CD8 in spleen, non tumor-draining lymph node (ndLN), and tumor-draining lymph node (dLN), determined by flow cytometry in Treg-depleted and anti-CD4/CD8 treated (Treg<sup>-</sup> + anti-CD4/CD8; A; N = 3), Treg-depleted and anti-CD4 treated (Treg<sup>-</sup> + anti-CD4; B; N = 3), or Treg-depleted and anti-CD8 treated (Treg<sup>-</sup> + anti-CD8; C; N = 4), relative to Treg-depleted (Treg<sup>-</sup>; circles) Foxp3<sup>DTR</sup> animals at the end of treatment. (D-F) Counts of immune cells per high power field of view for tumors of Treg-depleted and anti-CD4/CD8 treated (Treg<sup>-</sup> + anti-CD4/CD8; D; N = 16), Treg-depleted and anti-CD4 treated (Treg<sup>-</sup> + anti-CD4; E; N = 11), or Treg-depleted and anti-CD8 treated (Treg<sup>-</sup> + anti-CD8; F; N = 8), relative to Treg-depleted (Treg<sup>-</sup>; circles; N = 12) Foxp3<sup>DTR</sup> animals at the end of treatment. Data are presented as median ± Interquartile range. Statistical significance was determined by Mann Whitney *t* tests.

Supplementary Figure 3

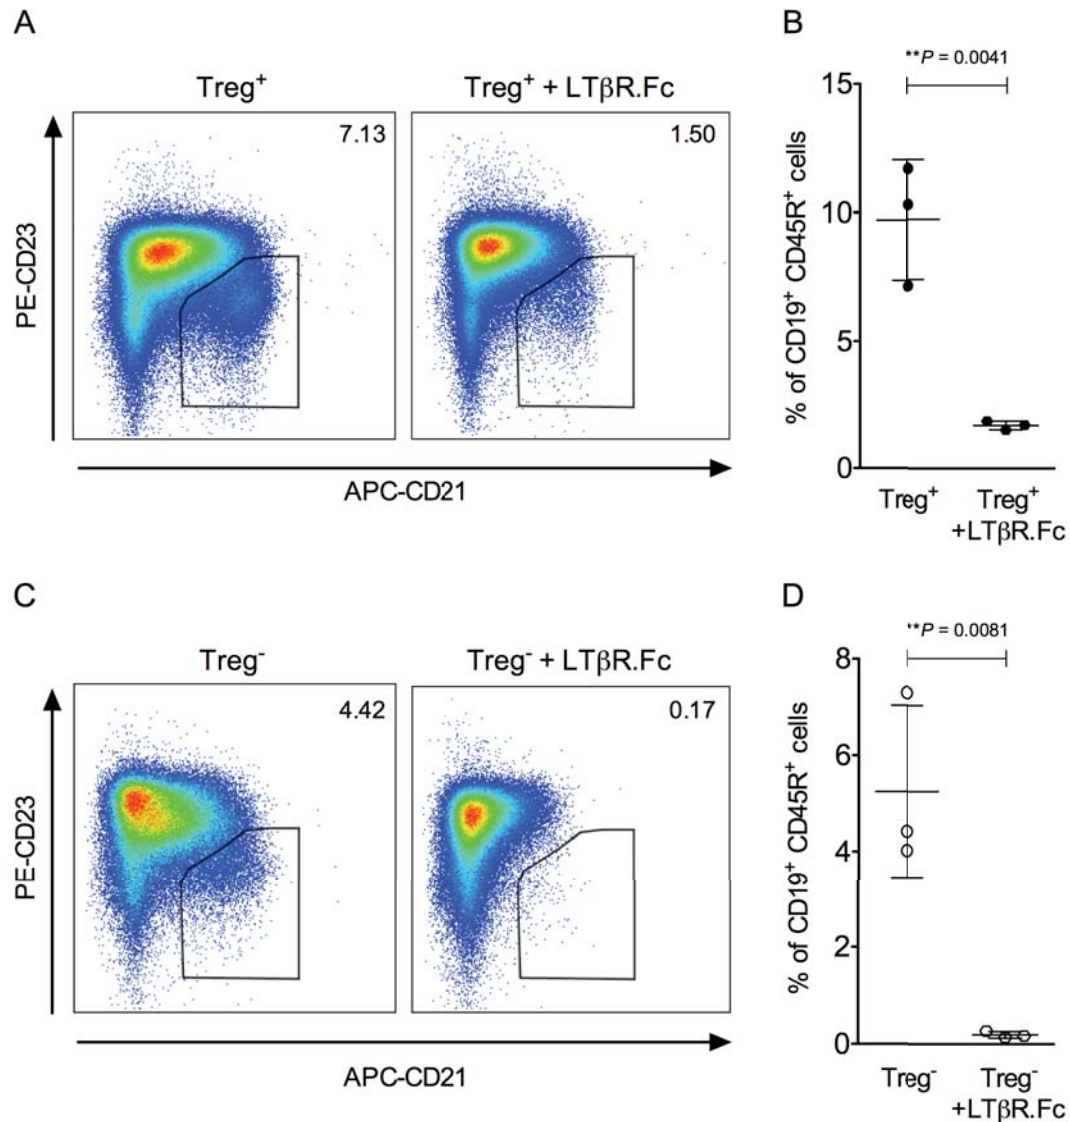

Supplementary Figure 3. Splenic Marginal Zone B cells are profoundly decreased after treatment with LTβR.Fc

(A-B) Representative flow cytometry plots showing the proportion of CD19<sup>+</sup> CD45R<sup>+</sup> B cells that are CD21<sup>hi</sup> CD23<sup>lo</sup> Marginal Zone (MZ) B cells, in the spleen of Treg-replete (Treg<sup>+</sup>) and Treg-replete LTβR.Fc treated (Treg<sup>+</sup> + LTβR.Fc) Foxp3<sup>DTR</sup> animals (left, right, respectively; A), or Treg-depleted (Treg<sup>-</sup>) and Treg-depleted LTβR.Fc treated (Treg<sup>-</sup> + LTβR.Fc) Foxp3<sup>DTR</sup> animals (left, right, respectively; B). Cells are gated on CD19<sup>+</sup>, CD45R<sup>+</sup>. Numbers represent MZ B cells (gated), as a proportion of live CD19<sup>+</sup> CD45R<sup>+</sup> B cells. Expression of CD23 is shown on the y-axis; expression of CD21 is shown on the x-axis. (C-D) Proportion of CD19<sup>+</sup> CD45R<sup>+</sup> B cells that are CD21<sup>hi</sup> CD23<sup>lo</sup> MZ B cells (left hand graphs) in spleen of Treg-replete (Treg<sup>+</sup>) and Treg-replete LTβR.Fc treated (Treg<sup>+</sup> + LTβR.Fc) Foxp3<sup>DTR</sup> animals (C) or Treg-depleted (Treg<sup>-</sup>) and Treg-depleted LTβR.Fc treated (Treg<sup>-</sup> + LTβR.Fc) Foxp3<sup>DTR</sup> animals (D). Data are presented as individual data points and mean ± Standard Deviation (SD). Statistical significance was determined by unpaired *t* tests. N = 3 per group.

## Supplementary Figure 4

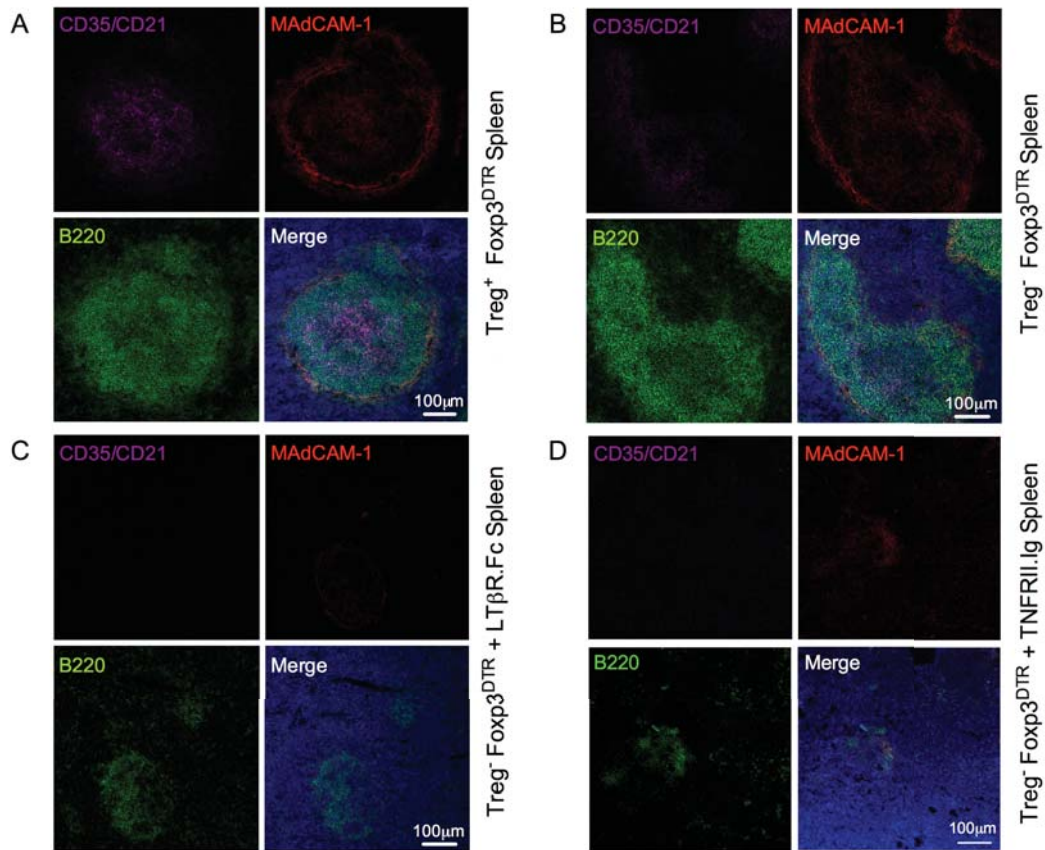

Supplementary Figure 4. Splenic Follicular Dendritic Cells and MAdCAM-1 staining are lost after treatment with LTβR.Fc or TNFRII.Ig  
Representative high power images of Follicular Dendritic Cells (FDCs; CD35/CD21; purple), and MAdCAM-1 staining of marginal sinus-lining stromal cells (red) around B cells follicles (B220; green) in the Spleen of Treg-replete (Treg<sup>+</sup>; A), Treg-depleted (Treg<sup>-</sup>; B), Treg-depleted, LTβR.Fc treated (Treg<sup>-</sup> + LTβR.Fc; C), and Treg-depleted, TNFRII.Ig treated (Treg<sup>-</sup> + TNFRII.Ig; D) Foxp3<sup>DTR</sup> animals. Merged images include the nuclear stain DAPI (blue).

Supplementary Figure 5

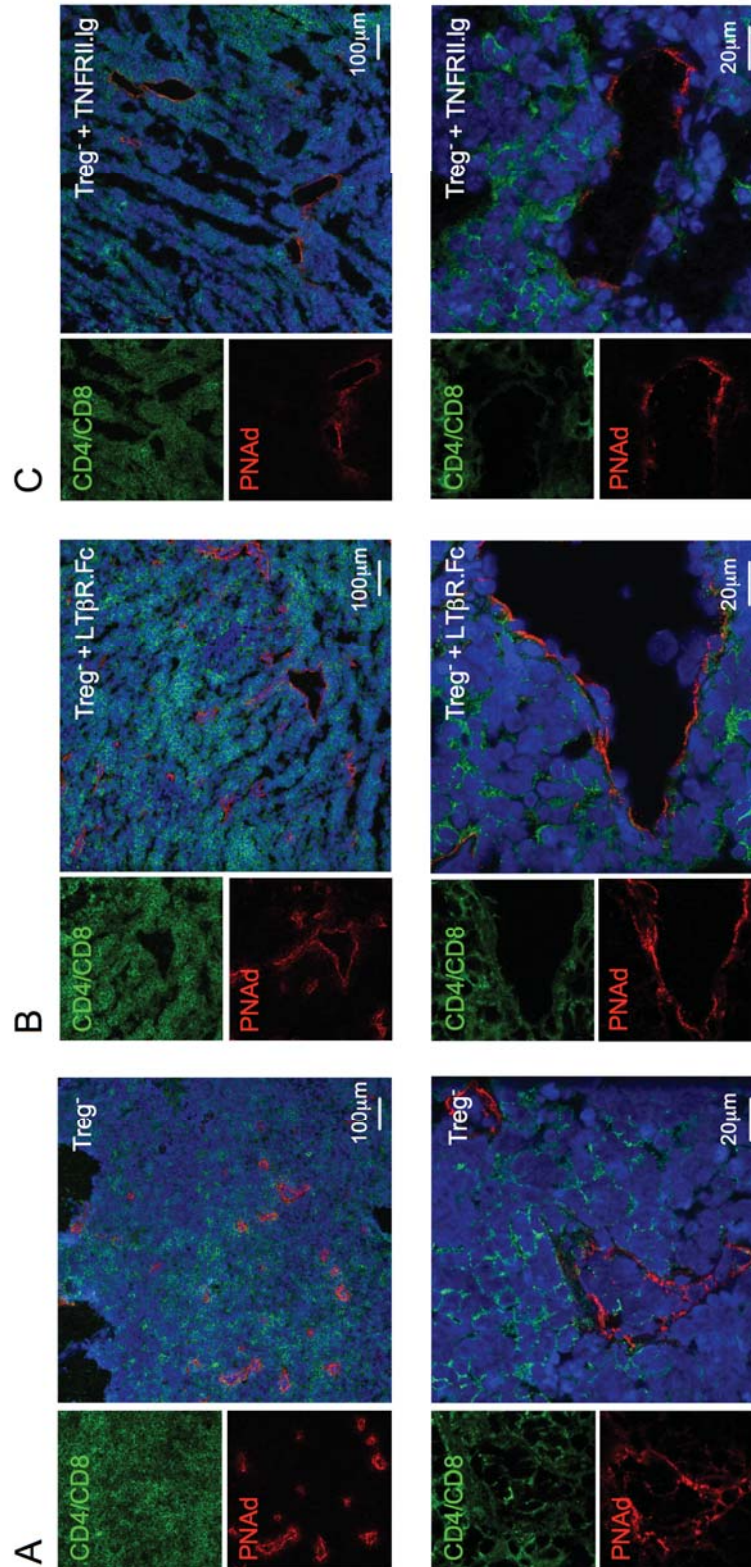

Supplementary Figure 5. Lymph Node architecture is disrupted following treatment with LTβR.Fc or TNFR11.Ig

Representative low power (top panels) and high power (lower panels) images of HEV (PNAd; red) and T cells (CD4/CD8; green) in Lymph Nodes of Treg-depleted (Treg<sup>-</sup>; A), Treg-depleted, LTβR.Fc treated (Treg<sup>-</sup> + LTβR.Fc; B), and Treg-depleted, TNFR11.Ig treated (Treg<sup>-</sup> + TNFR11.Ig; C) Foxp3<sup>DTTR</sup> animals. Merged images include the nuclear stain DAPI (blue).

Supplementary Figure 6

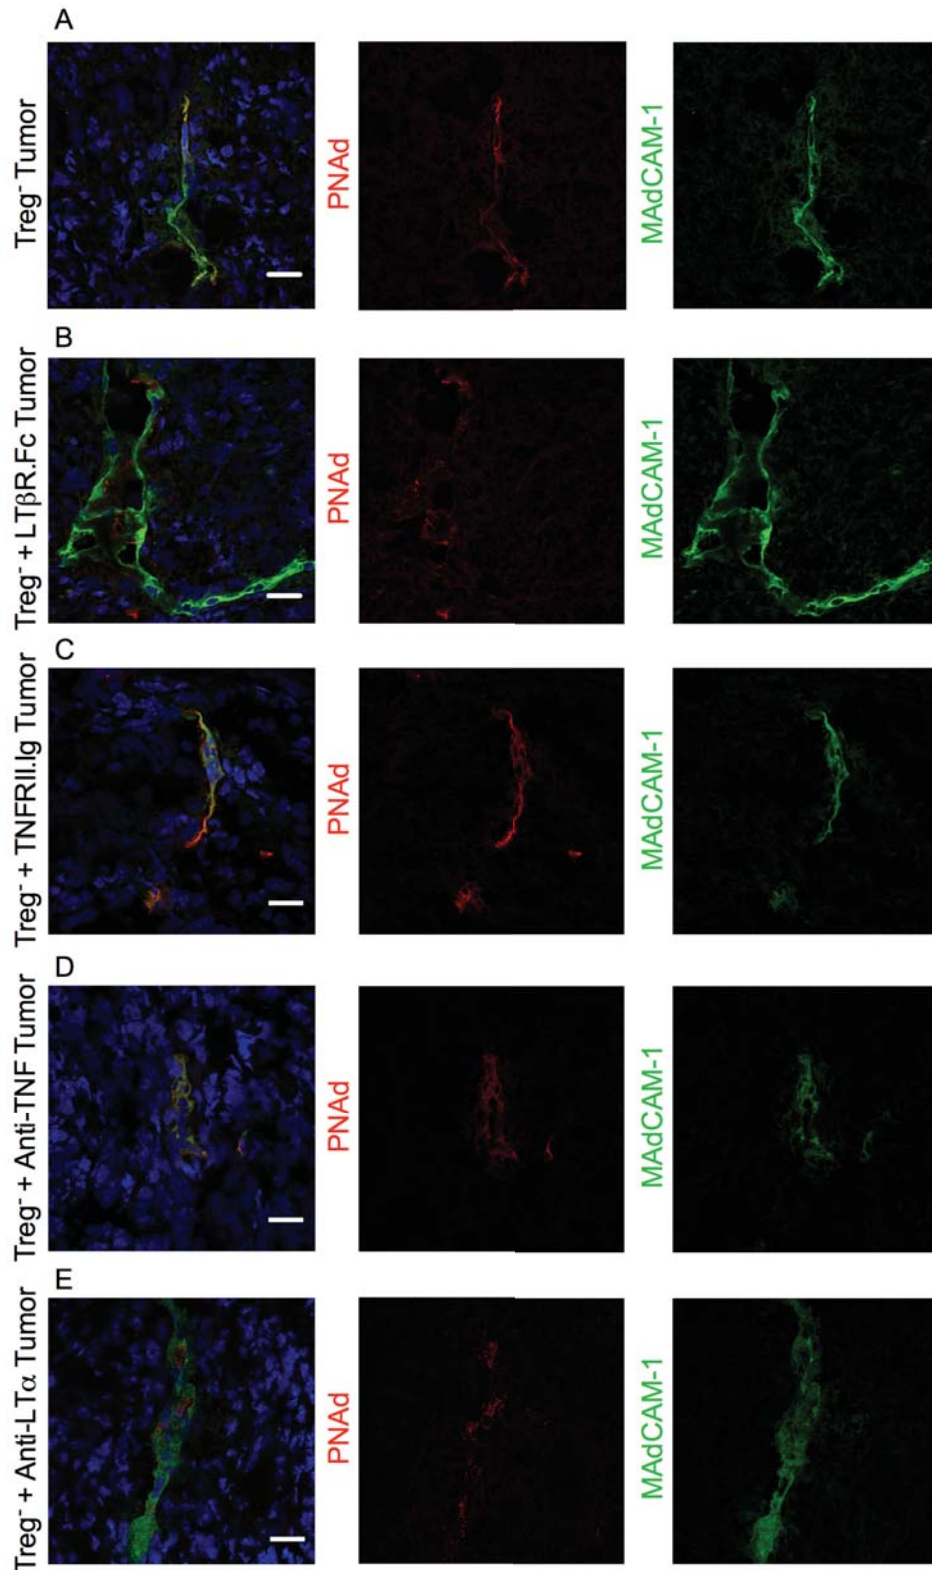

Supplementary Figure 6. Tumor HEV identified by PNAd staining following blockade of LTβR or TNFR signalling are also positive for MAdCAM-1  
Representative high power images of HEV (PNAd; red, MAdCAM1; green, nuclear stain DAPI; blue) in frozen tumors from Treg<sup>-</sup> (A; as shown in Supplementary Figure 1) Treg<sup>-</sup> + LTβR.Fc (B), Treg<sup>-</sup> + TNFRII.Ig (C), Treg<sup>-</sup> + anti-TNF (D), and Treg<sup>-</sup> + anti-LTα (E) tumors. Scale bars represent 20μm.

Supplementary Figure 7

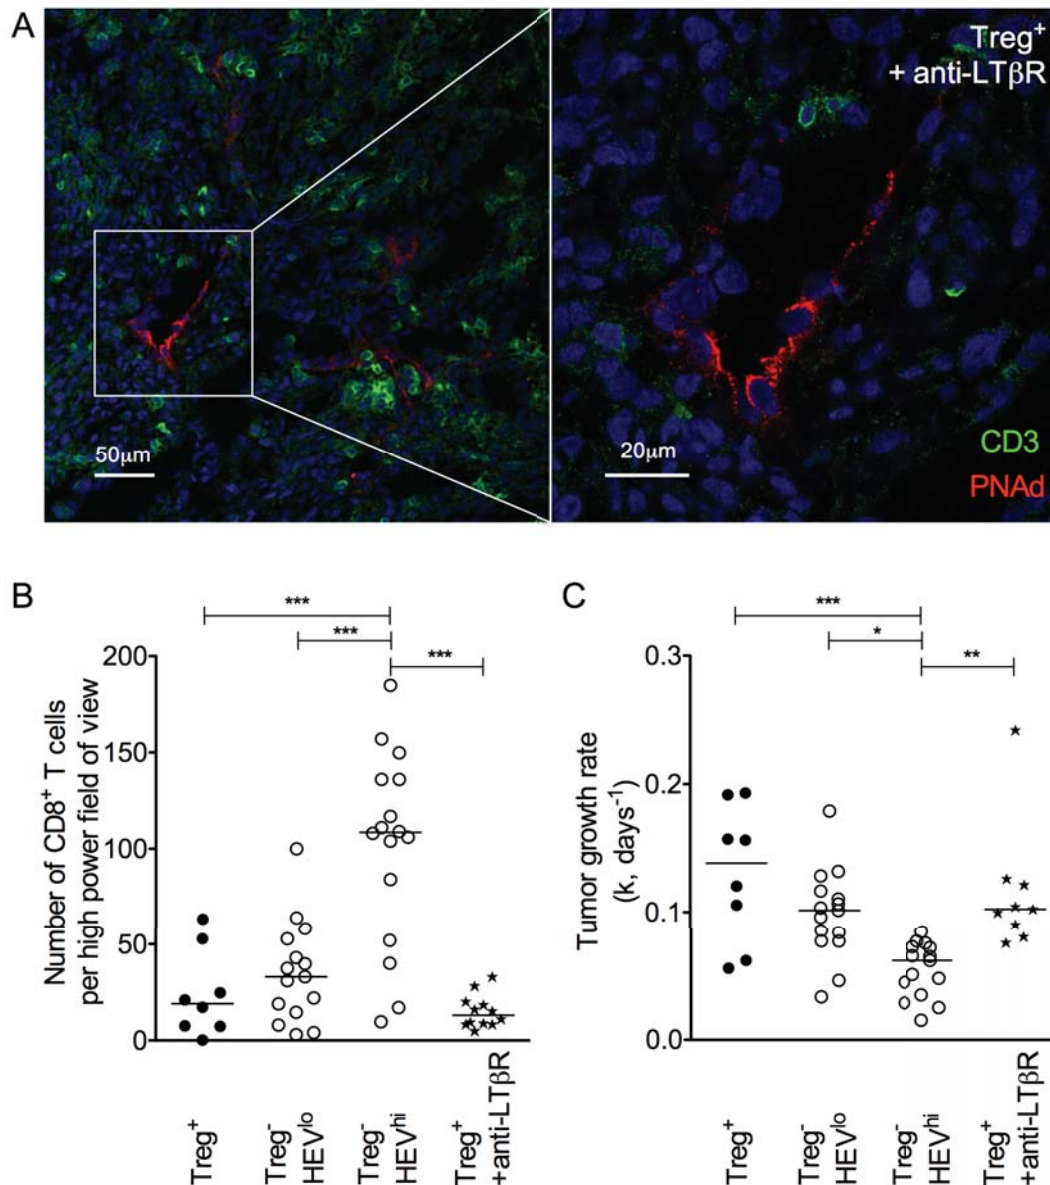

Supplementary Figure 7. Agonism of LT $\beta$ R induces formation of High Endothelial Venules in Treg replete tumors, but without concomitant increased T cell infiltration and reduced tumor growth (A) Representative low and high power images of HEV (PNAd; red) alongside T cells (CD3; green) in a tumor of a Treg replete Foxp3<sup>DTR</sup> animal treated with agonistic anti-LT $\beta$ R antibody (Treg<sup>+</sup> + anti-LT $\beta$ R). Merged images include the nuclear stain DAPI (blue). (B) Number of CD8<sup>+</sup> T cells in tumors of Treg<sup>+</sup> (N = 8), Treg<sup>-</sup> HEV<sup>-</sup> (N = 12), Treg<sup>-</sup> HEV<sup>+</sup> (N = 14), and Treg<sup>+</sup> anti-LT $\beta$ R treated Foxp3<sup>DTR</sup> animals (N = 12). (C) Tumor growth rates (k, days<sup>-1</sup>) for Treg<sup>+</sup> (N = 8), Treg<sup>-</sup> HEV<sup>-</sup> (N = 12), Treg<sup>-</sup> HEV<sup>+</sup> (N = 13), and Treg<sup>+</sup> anti-LT $\beta$ R treated Foxp3<sup>DTR</sup> animals (N = 9). Statistical significance was determined by One-Way ANOVA with Tukey's tests to compare pairs of means (\* =  $P \leq 0.05$ , \*\* =  $P \leq 0.01$ , \*\*\* =  $P \leq 0.001$ ).



Supplementary Figure 8

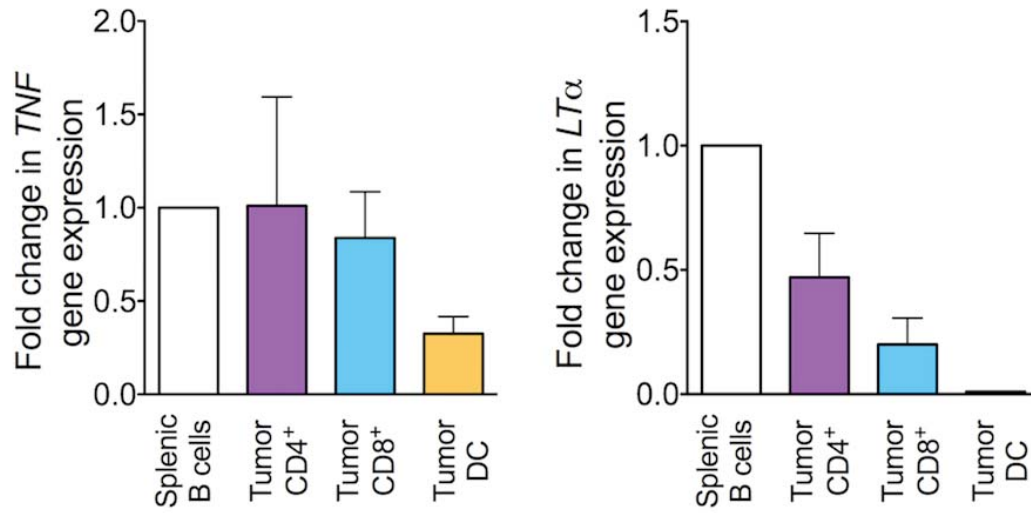

Supplementary Figure 8. Relative gene expression of *TNF* and *LTα* by intratumoral CD4<sup>+</sup> and CD8<sup>+</sup> T cells and dendritic cells (DC). Data are expressed as fold change in gene expression relative to splenic B cells, and represent two independent experiments.
