# Supplementary material
Source: PubMed Central journal article supplement (PMC5668144)
Supplement: NIHMS908508-supplement-2.pdf [file NIHMS908508-supplement-2.pdf]

**Supplementary Table S1**

| <b>Antibody</b>                                | <b>Conjugate</b>            | <b>Clone</b>      | <b>Company</b>                               |
|------------------------------------------------|-----------------------------|-------------------|----------------------------------------------|
| <i>Flow Cytometry Antibodies</i>               |                             |                   |                                              |
| CD3                                            | PE-Cy5                      | 17A2              | BD Biosciences                               |
| CD4                                            | APC-eFluor780               | RM4-5             | eBioscience                                  |
| CD8a                                           | Pacific Blue                | 53-6.7            | BD Biosciences                               |
| CD8a                                           | APC                         | 53-6.7            | eBioscience                                  |
| CD21/CD35                                      | APC                         | 7G6               | BD Biosciences                               |
| CD23                                           | PE                          | B3B4              | Biologend                                    |
| CD45R/B220                                     | FITC                        | RA3-6B2           | Biologend                                    |
| TNF $\alpha$                                   | FITC                        | MP6-XT22          | eBioscience                                  |
| <i>Immunofluorescence Primary Antibodies</i>   |                             |                   |                                              |
| CD3                                            | Purified                    | Rabbit Polyclonal | Dako                                         |
| CD4                                            | Purified                    | RM4-5             | Biologend                                    |
| CD8a                                           | Purified                    | 53-6.7            | eBioscience                                  |
| CD21/CD35                                      | APC                         | 7G6               | BD Biosciences                               |
| CD31                                           | FITC                        | 390               | eBioscience                                  |
| CD45R/B220                                     | FITC                        | RA3-6B2           | Biologend                                    |
| CD11c                                          | Biotinylated                | HL3               | BD Biosciences                               |
| CCL21                                          | Purified                    | Goat Polyclonal   | R&D Systems                                  |
| LYVE-1                                         | Purified                    | Rabbit Polyclonal | (gift from David Jackson, Oxford University) |
| MHC Class II                                   | APC                         | M5/114.15.2       | eBioscience                                  |
| PNAd                                           | Biotinylated                | MECA-79           | Biologend                                    |
| MAdCAM-1                                       | AlexaFluor <sup>®</sup> 488 | MECA-367          | eBioscience                                  |
| <i>Immunofluorescence Secondary Antibodies</i> |                             |                   |                                              |
| Rat IgG                                        | AlexaFluor <sup>®</sup> 488 |                   | Life Technologies                            |
| Rat IgG                                        | AlexaFluor <sup>®</sup> 568 |                   | Life Technologies                            |
| Rat IgG2a                                      | FITC                        |                   | Biologend                                    |
| Rabbit IgG                                     | AlexaFluor <sup>®</sup> 647 |                   | Life Technologies                            |
| Rat IgM                                        | AlexaFluor <sup>®</sup> 594 |                   | Life Technologies                            |
| Streptavidin                                   | AlexaFluor <sup>®</sup> 555 |                   | Life Technologies                            |
| Streptavidin                                   | FITC                        |                   | Life Technologies                            |
